# Supplementary material for: Bacillus velezensis ES2-4 Modulates Root Exudation and Microbiome Remodeling to Enhance Soybean Resistance Against Gray Mold
Source: Research Square preprint supplement (doi:10.21203/rs.3.rs-7283311/v1), 2025-08-21
Supplement: Supplementary file 1 [file 4583a70cee1f9c8b6429d7ae.docx]

**Table S1 α diversity analysis of bacteria by groups./**

| Microorganism | Sample | Sobs | Ace | Chao | Shannon | Simpson |
| --- | --- | --- | --- | --- | --- | --- |
| Bacteria | B1 | 20956 | 20956 | 20956 | 5.343018 | 0.032646 |
| B2 | 20627 | 20627 | 20627 | 5.372179 | 0.032004 |
| B3 | 20739 | 20739 | 20739 | 5.395109 | 0.029964 |
| B4 | 20142 | 20142 | 20142 | 5.295995 | 0.034585 |
| B5 | 20739 | 20739 | 20739 | 5.382448 | 0.031949 |
| BE1 | 21094 | 21094 | 21094 | 5.414799 | 0.031364 |
| BE2 | 21200 | 21200 | 21200 | 5.46985 | 0.028991 |
| BE3 | 20884 | 20884 | 20884 | 5.471662 | 0.02894 |
| BE4 | 21443 | 21443 | 21443 | 5.578471 | 0.02675 |
| BE5 | 20993 | 20993 | 20993 | 5.466617 | 0.029152 |
| CK1 | 21178 | 21178 | 21178 | 5.589712 | 0.024509 |
| CK2 | 21297 | 21297 | 21297 | 6.158164 | 0.012136 |
| CK3 | 21856 | 21856 | 21856 | 5.973743 | 0.016265 |
| CK4 | 21520 | 21520 | 21520 | 6.091182 | 0.013669 |
| CK5 | 21707 | 21707 | 21707 | 6.069457 | 0.013732 |
| E1 | 21078 | 21078 | 21078 | 6.081099 | 0.014137 |
| E2 | 21474 | 21474 | 21474 | 5.837186 | 0.018889 |
| E3 | 21223 | 21223 | 21223 | 5.916772 | 0.018102 |
| E4 | 21900 | 21900 | 21900 | 5.719754 | 0.023781 |
| E5 | 22007 | 22007 | 22007 | 6.005076 | 0.016121 |

**Table S2 β diversity analysis of fungi by groups**

| Microorganism | Sample | Sobs | Ace | Chao | Shannon | Simpson |
| --- | --- | --- | --- | --- | --- | --- |
| Fungi | B1 | 449 | 449 | 449 | 4.248119 | 0.034246 |
| B2 | 441 | 441 | 441 | 4.269806 | 0.034495 |
| B3 | 454 | 454 | 454 | 4.197371 | 0.038719 |
| B4 | 454 | 454 | 454 | 3.995889 | 0.049281 |
| B5 | 422 | 422 | 422 | 4.214145 | 0.036512 |
| BE1 | 388 | 388 | 388 | 4.312464 | 0.030568 |
| BE2 | 415 | 415 | 415 | 4.412795 | 0.027815 |
| BE3 | 389 | 389 | 389 | 4.374984 | 0.028859 |
| BE4 | 406 | 406 | 406 | 4.406049 | 0.028527 |
| BE5 | 436 | 436 | 436 | 4.303731 | 0.03529 |
| CK1 | 433 | 433 | 433 | 4.316802 | 0.033095 |
| CK2 | 334 | 334 | 334 | 4.408405 | 0.031729 |
| CK3 | 373 | 373 | 373 | 4.485282 | 0.024903 |
| CK4 | 337 | 337 | 337 | 4.422489 | 0.027156 |
| CK5 | 394 | 394 | 394 | 4.365324 | 0.030322 |
| E1 | 324 | 324 | 324 | 4.471311 | 0.025235 |
| E2 | 384 | 384 | 384 | 4.433745 | 0.027215 |
| E3 | 359 | 359 | 359 | 4.404555 | 0.027092 |
| E4 | 359 | 359 | 359 | 4.402069 | 0.025757 |
| E5 | 369 | 369 | 369 | 4.405303 | 0.028294 |


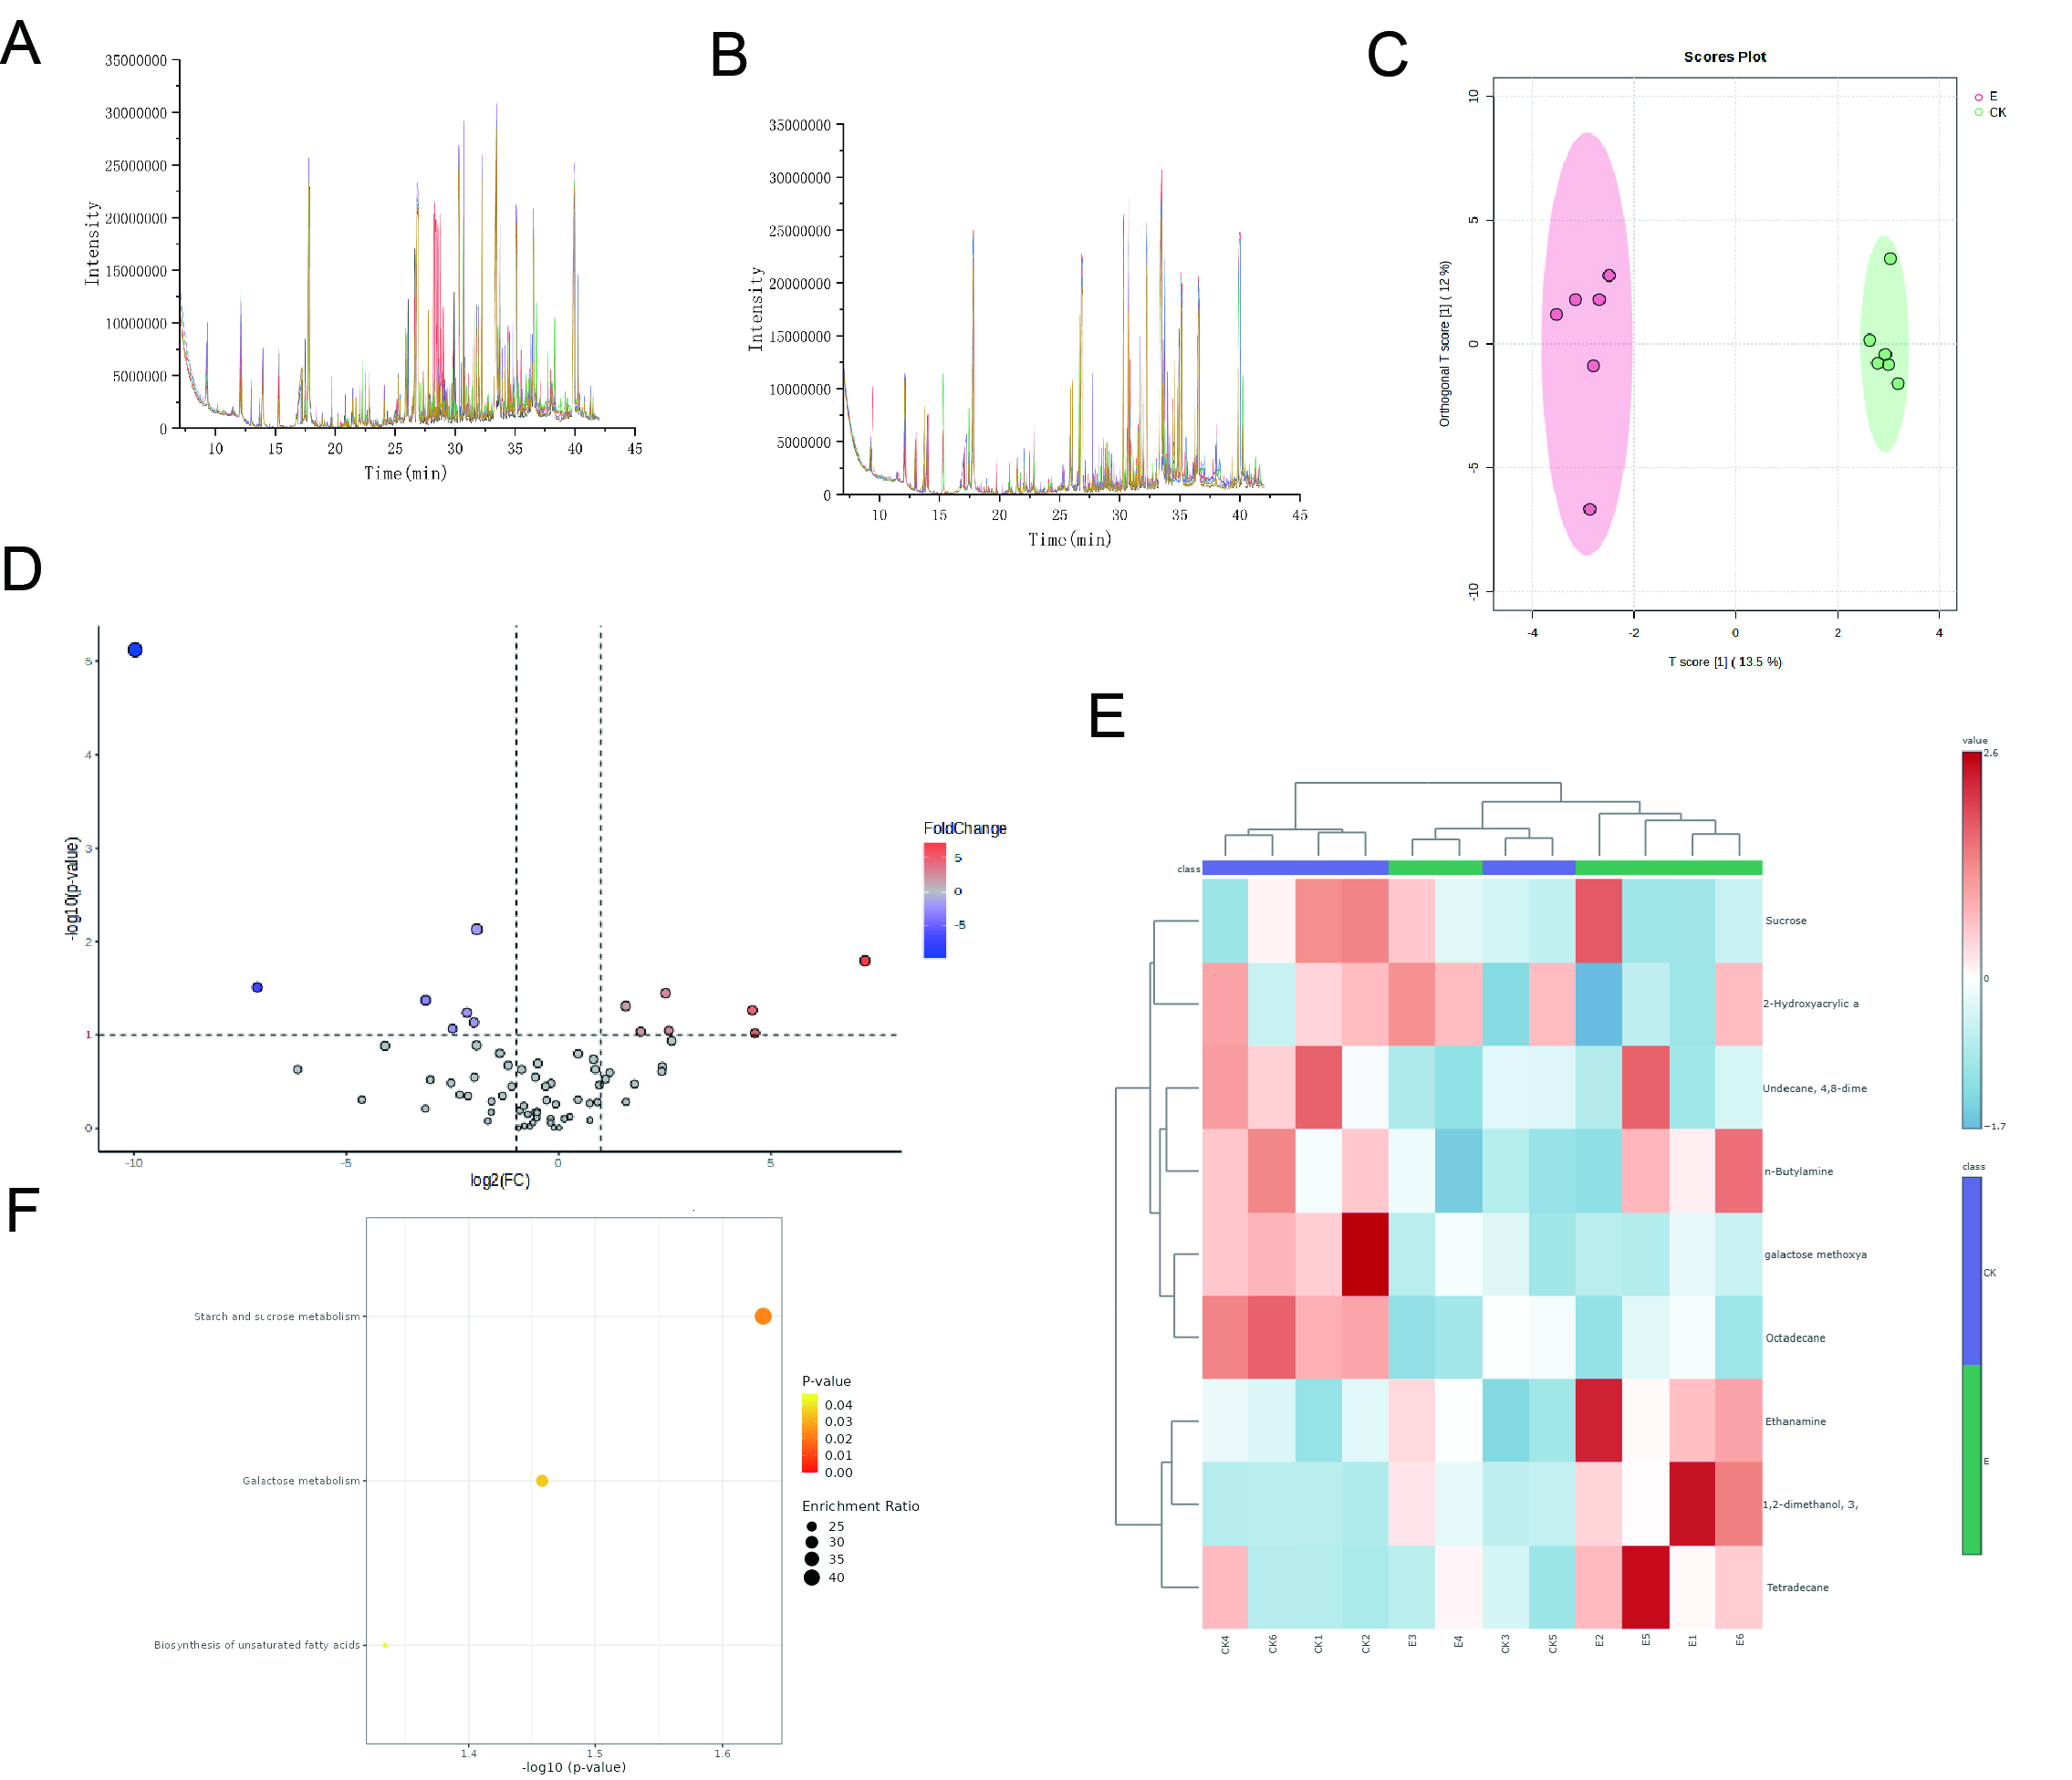


**Figure S1. Metabolomic analysis of soybean root exudates under *Bacillus velezensis* ES2-4 treatment.** (A, B) Total ion chromatograms (TIC) of metabolites in CK and E groups, showing distinct intensity profiles across retention times. (C) OPLS-DA score plot demonstrating clear metabolic separation between CK and E groups. (D) Volcano plot highlighting significantly upregulated (red) and downregulated (blue) metabolites (|log2FC| > 1.5, VIP > 1.0). (E) Heatmap of the top 25 enriched metabolite clusters, with red indicating high abundance between CK and E groups. (F) Overview of enriched metabolic pathways. Pathway mapping was conducted using the Kyoto Encyclopedia of Genes and Genomes (KEGG) database.

**Table S3 Topological properties of the relevant network of rhizosphere bacteria in each group**

| Topological features | CK | E | B | BE |
| --- | --- | --- | --- | --- |
| Nodes | 49 | 48 | 47 | 50 |
| Links | 388 | 379 | 139 | 154 |
| Average degree | 15.837 | 15.792 | 5.915 | 6.16 |
| Network Diameter | 10 | 9 | 8 | 13 |
| graph density | 0.33 | 0.336 | 0.129 | 0.126 |
| Average Clustering coefficient | 0.753 | 0.736 | 0.649 | 0.573 |
| Average Path Length | 2.625 | 2.542 | 3.358 | 4.114 |
| Positive correlation | 50.77 | 54.35 | 56.12 | 53.9 |
| Negative correlation | 49.23 | 45.65 | 43.88 | 46.1 |

**Table S4 Topological properties of the relevant network of rhizosphere fungi in each group**

| Topological features | CK | E | B | BE |
| --- | --- | --- | --- | --- |
| Nodes | 49 | 49 | 47 | 49 |
| Links | 180 | 159 | 104 | 108 |
| Average degree | 7.347 | 6.49 | 4.426 | 4.408 |
| Network Diameter | 9 | 11 | 12 | 12 |
| graph density | 0.153 | 0.135 | 0.096 | 0.092 |
| Average Clustering coefficient | 0.533 | 0.583 | 0.434 | 0.645 |
| Average Path Length | 3.312 | 3.702 | 4.261 | 4.758 |
| Positive correlation | 53.33 | 61.01 | 68.27 | 66.67 |
| Negative correlation | 46.67 | 38.99 | 31.73 | 33.33 |

**Table S5 Key bacterial in the correlation network of each group at the** **genus level**

| CK | | E | | B | | BE | |
| --- | --- | --- | --- | --- | --- | --- | --- |
| Genus | Degree | Genus | Degree | Genus | Degree | Genus | Degree |
| Alphaproteobacteria | 26 | Reticulibacter | 28 | Ktedonobacter | 11 | Reticulibacter | 14 |
| Reticulibacter | 26 | Alphaproteobacteria | 28 | Edaphobacter | 11 | Ktedonobacteraceae | 14 |
| Devosia | 26 | Proteobacteria | 28 | Acidobacterium | 11 | Chloroflexi | 14 |
| Myxococcales | 26 | Acidobacteria | 28 | Ktedonobacteraceae | 11 | Mycobacterium | 14 |
| Chloroflexi | 26 | Ktedonobacteraceae | 28 | Chloroflexi | 11 | Ktedonobacter | 14 |
| Phenylobacterium | 26 | Ktedonobacter | 28 | Devosia | 11 | Edaphobacter | 14 |
| Acidobacteriia | 26 | Bacteroidota | 28 | Nitrobacteraceae | 10 | Dictyobacter | 14 |
| Pseudonocardia | 24 | Dictyobacter | 28 | Xanthobacteraceae | 10 | Ktedonosporobacter | 14 |
| Proteobacteria | 24 | Planctomycetota | 28 | Granulicella | 10 | Acidobacteriia | 14 |
| Acidobacteria | 24 | Acidobacteriia | 28 | Verrucomicrobia | 10 | Deltaproteobacteria | 13 |

**Table S6 Key fungi in the correlation network of each group at the genus level**

| CK | | E | | B | | BE | |
| --- | --- | --- | --- | --- | --- | --- | --- |
| Genus | Degree | Genus | Degree | Genus | Degree | Genus | Degree |
| Rhizopus | 13 | Penicillium | 8 | Tulasnella | 16 | Pleurotus | 8 |
| Aureobasidium | 13 | Termitomyces | 8 | Trametes | 14 | Madurella | 8 |
| Ceratobasidium | 13 | Suillus | 8 | Termitomyces | 14 | Rhizophagus | 7 |
| Anaeromyces | 13 | Oidiodendron | 8 | Sporothrix | 14 | Botryobasidium | 7 |
| Trametes | 12 | Tulasnella | 7 | Pseudogymnoascus | 11 | Aspergillus | 7 |
| Toensbergia | 12 | Pseudogymnoascus | 7 | Suillus | 11 | Gyrodon | 7 |
| Tulasnella | 12 | Tulasnellaceae | 7 | Mycena | 11 | Suillus | 7 |
| Aspergillus | 12 | Ceratobasidium | 7 | Serendipita | 11 | Anaeromyces | 7 |
| Tulasnellaceae | 12 | Aspergillus | 7 | Cantharellus | 11 | Cantharellus | 7 |
| Syncephalis | 12 | Rhizophagus | 7 | Agaricus | 11 | Oidiodendron | 7 |
